# Supplementary material
Source: PubMed Central journal article supplement (PMC5830395)
Supplement: 2017_174987-Disclosures_and_Contributions.pdf [file 2017_174987-Disclosures_and_Contributions.pdf]

Haematologica  
HAEMATOL/2017/174987  
Version 3

High throughput sequencing in acute lymphoblastic leukemia reveals  
clonal architecture of central nervous system and bone marrow  
compartments

Jack Bartram, Nick Goulden, Gary Wright, Stuart Adams, Tony Brooks,  
Darren Edwards, Sarah Inglott, Yasar Yousafzai, Mike Hubank, and  
Christina Halsey

Disclosures: none

Contributions: J.B. designed and performed research, collected, analysed and interpreted data, and wrote the manuscript; N.G. designed the research and wrote the manuscript; G.W. performed research, collected, analysed and interpreted data; S.A. performed research, collected, analysed and interpreted data; T.B. performed research and analysed data; D.E. performed research and collected data; S.I. performed research, collected, analysed and interpreted data; Y.Y. designed and performed research and collected data; M.H. designed and performed research, analysed and interpreted data; C.H. designed and performed research, collected, analysed and interpreted data, and wrote the manuscript. All authors approved the manuscript.
